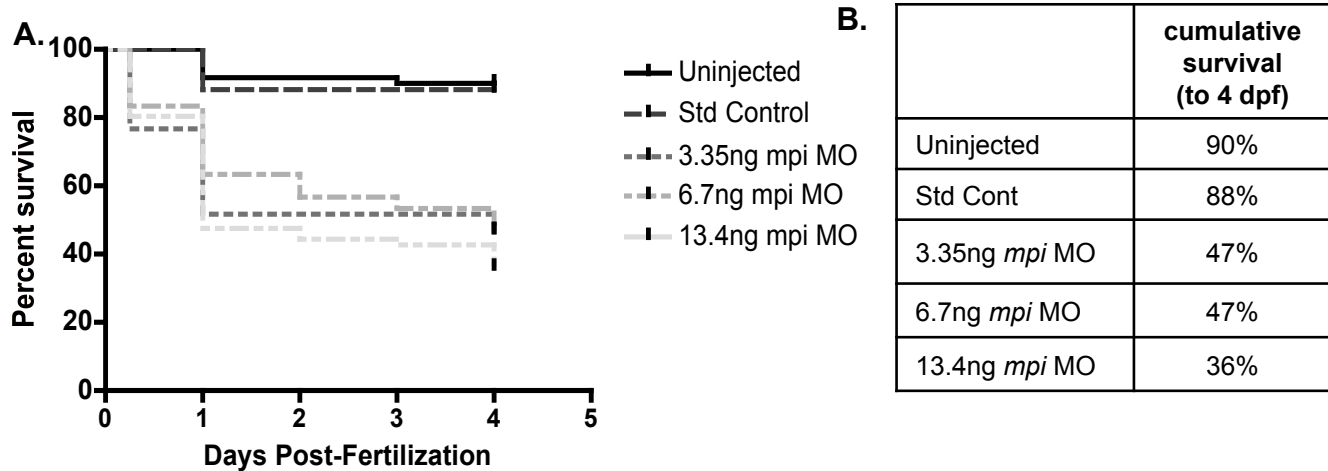

**Figure S1. *mpi* morphants have worse survival with increased *Mpi* knockdown. A.)** Kaplan-Meier curve of uninjected embryos as compared to embryos injected with standard control MO and increasing amounts of *mpi* MO. N = 60 embryos for all groups at time of injection. **B.)** Cumulative survival by 4 dpf of larvae scored in panel A.

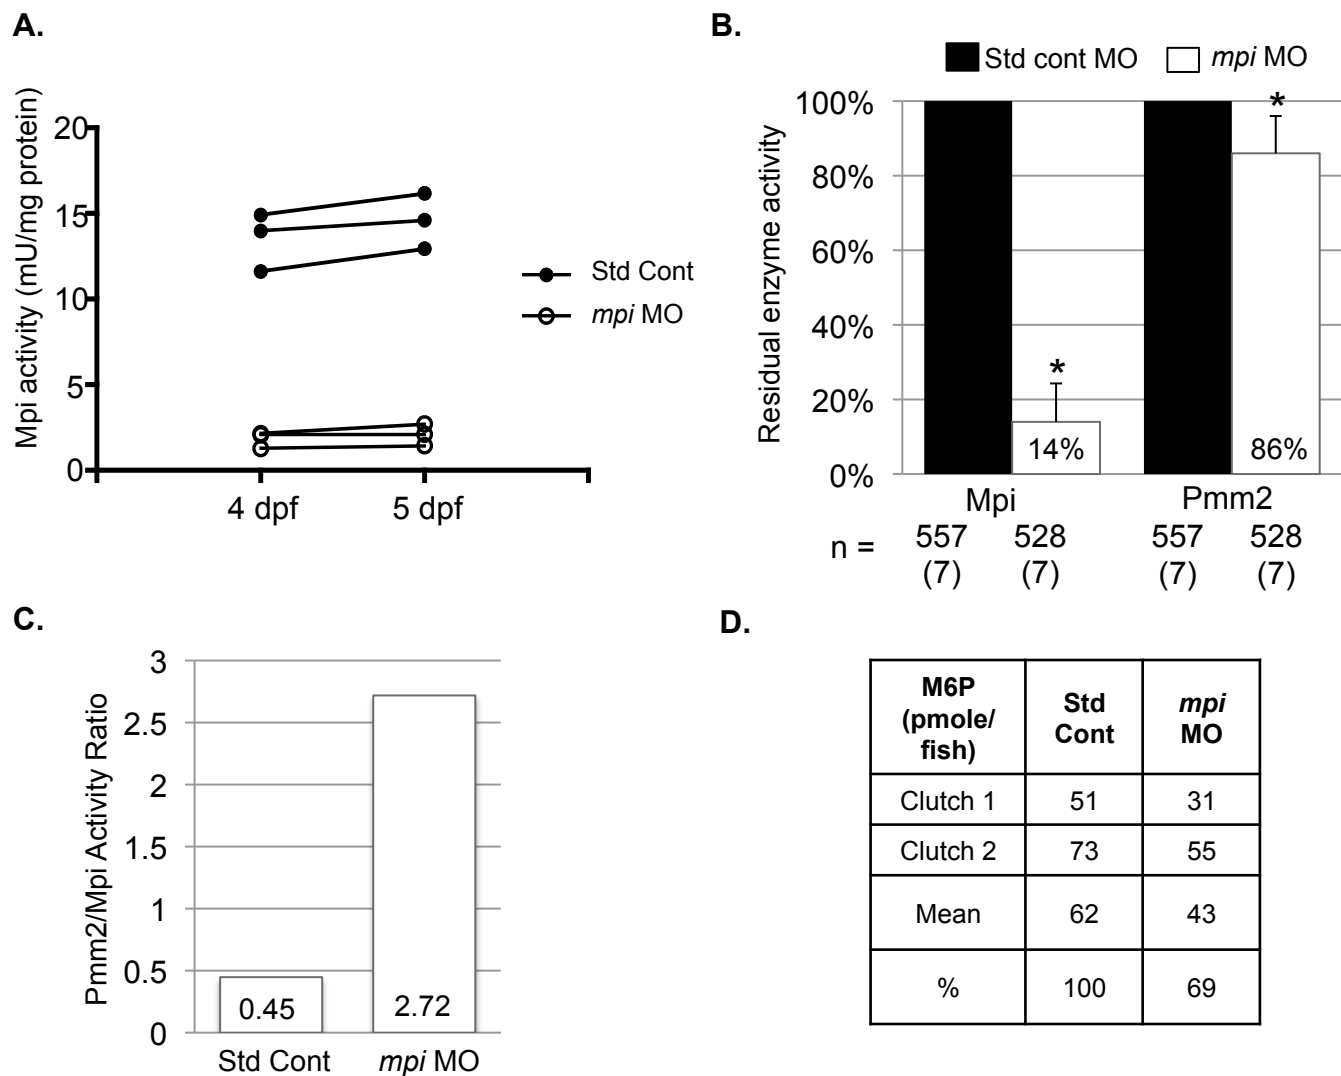

**Figure S2. *mpi* morpholino specifically depletes Mpi activity and decreases mannose 6-phosphate.** **A.)** Mpi activity does not significantly change from in 4 dpf compared to 5 dpf in *mpi* morphant embryos ( $p = 0.71$  by paired T-test). **B.)** Mpi and Pmm2 enzyme activity are significantly decreased in *mpi* MO ( $p = 8.27861 \times 10^{-6}$  and  $0.048$ , respectively, by paired T-test). **C.)** Pmm2/Mpi activity ratio is increased in *mpi* morphants. Average of mU/mg of protein for 7 experiments. **D.)** Standard coupled assay for M6P demonstrates that 4 dpf *mpi* morphants have only 69% of M6P compared to controls. Results from 2 experiments are shown.

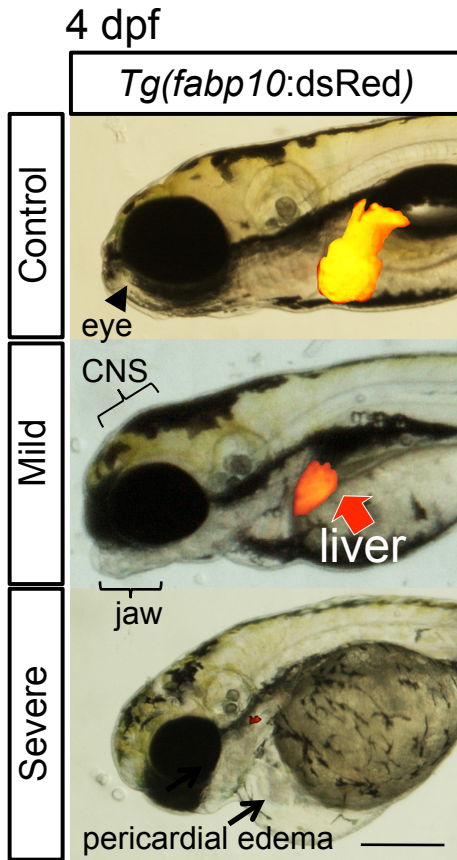

**Figure S3. *mpi* morphants show multisystemic defects, including abnormal liver development as visualized in *Tg(fabp10:dsRed)* embryos at 4 dpf. Scale bar = 500 microns.**

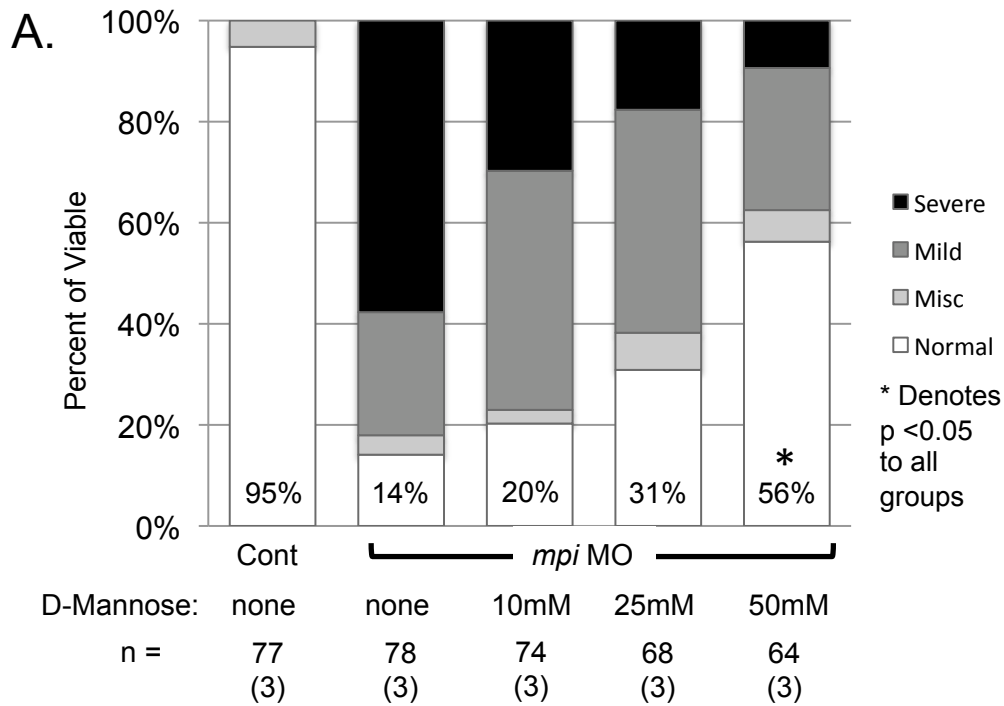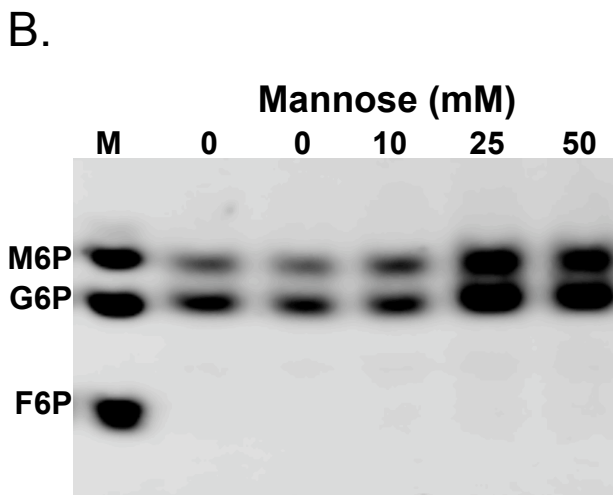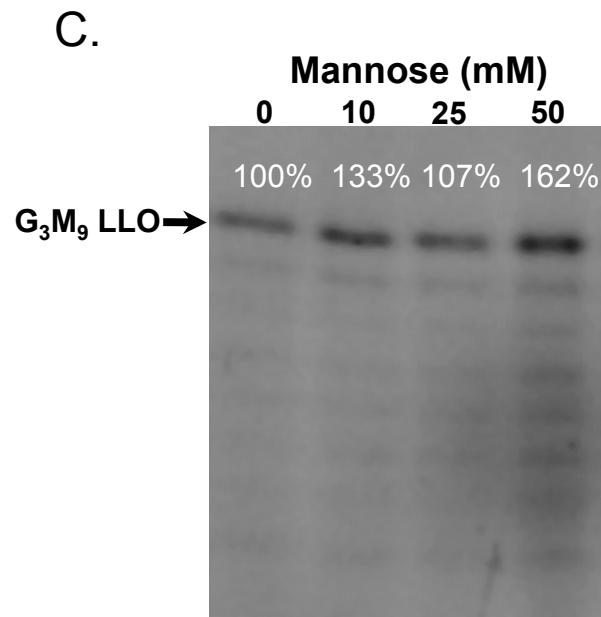

**Figure S4. Mannose titration shows increased rescue of *mpi* MO phenotype, increased M6P levels, and no degradation of LLO levels. A.) Phenotypic scoring of control and *mpi* MO injected embryos treated with increasing concentrations of D-mannose from 0 to 96 hpf. B.) M6P levels increase in control embryos treated with increasing mannose concentrations from 0 to 50mM. C.) FACE analysis showing no degradation of G<sub>3</sub>M<sub>9</sub> LLO with increasing concentrations of mannose from 0 to 50mM.**

---

Table S1. Cloning primers

---

zmpi\_degenerate\_Fwd 5'-GCC**CGAGGTCAAGGT**GTTTCCTCTGTGCTGT-3'  
ATG MO Seq            ATGGCGGAAGTGAAAGTGTTTCCTC  
zmpi            CGTTGCAGACATGGCGGAAGTGAAAGTGTT

---

Bases in bold represent introduced degeneracy.

| Mpi Enzyme Activity<br>(mU/mg of protein) | Uninjected | Standard<br>Control MO | 0.34ng <i>mpi</i><br>MO | 3.35ng <i>mpi</i><br>MO | 6.70ng <i>mpi</i> MO |
|-------------------------------------------|------------|------------------------|-------------------------|-------------------------|----------------------|
|                                           | 11.13      | 14.60                  | 10.77                   | 3.24                    | 2.16                 |
|                                           | 12.87      | 12.24                  | 10.22                   | 3.28                    | 0.93                 |
|                                           | 13.62      | 16.05                  | 11.13                   | 2.25                    | 1.86                 |
|                                           | 18.79      | 12.38                  |                         | 3.44                    | 2.39                 |
|                                           | 13.64      | 10.60                  |                         |                         | 1.02                 |
|                                           |            | 16.07                  |                         |                         | 1.00                 |
|                                           |            | 13.62                  |                         |                         | 1.29                 |
|                                           |            | 18.79                  |                         |                         | 0.33                 |
|                                           |            | 14.33                  |                         |                         | 3.80                 |
|                                           |            | 13.98                  |                         |                         | 2.64                 |
|                                           |            | 7.17                   |                         |                         | 2.01                 |
|                                           |            | 15.32                  |                         |                         | 2.16                 |
|                                           |            | 12.24                  |                         |                         | 2.09                 |
|                                           |            | 16.70                  |                         |                         | 1.88                 |
|                                           |            |                        |                         |                         |                      |
| Mean                                      | 14.02      | 13.86                  | 10.71                   | 3.05                    | 1.83                 |
| Median                                    | 13.62      | 14.16                  | 10.77                   | 3.26                    | 1.95                 |
| Standard Deviation                        | 2.86       | 2.88                   | 0.46                    | 0.54                    | 0.87                 |
| Percent of Control                        | 101.06%    | 100.00%                | 77.23%                  | 22.02%                  | 13.17%               |
| P=                                        | 0.92       | -                      | 1.50E-3                 | 7.94E-10                | 1.43E-10             |

**Table S2.** Mpi specific activity (mU/mg protein) shown for all clutches of embryos injected with standard control MO or increasing *mpi* MO amounts.
